# Supplementary material
Source: PubMed Central journal article supplement (PMC5111709)

**A****Hsu\_root (plotting 1st nt of footprint)**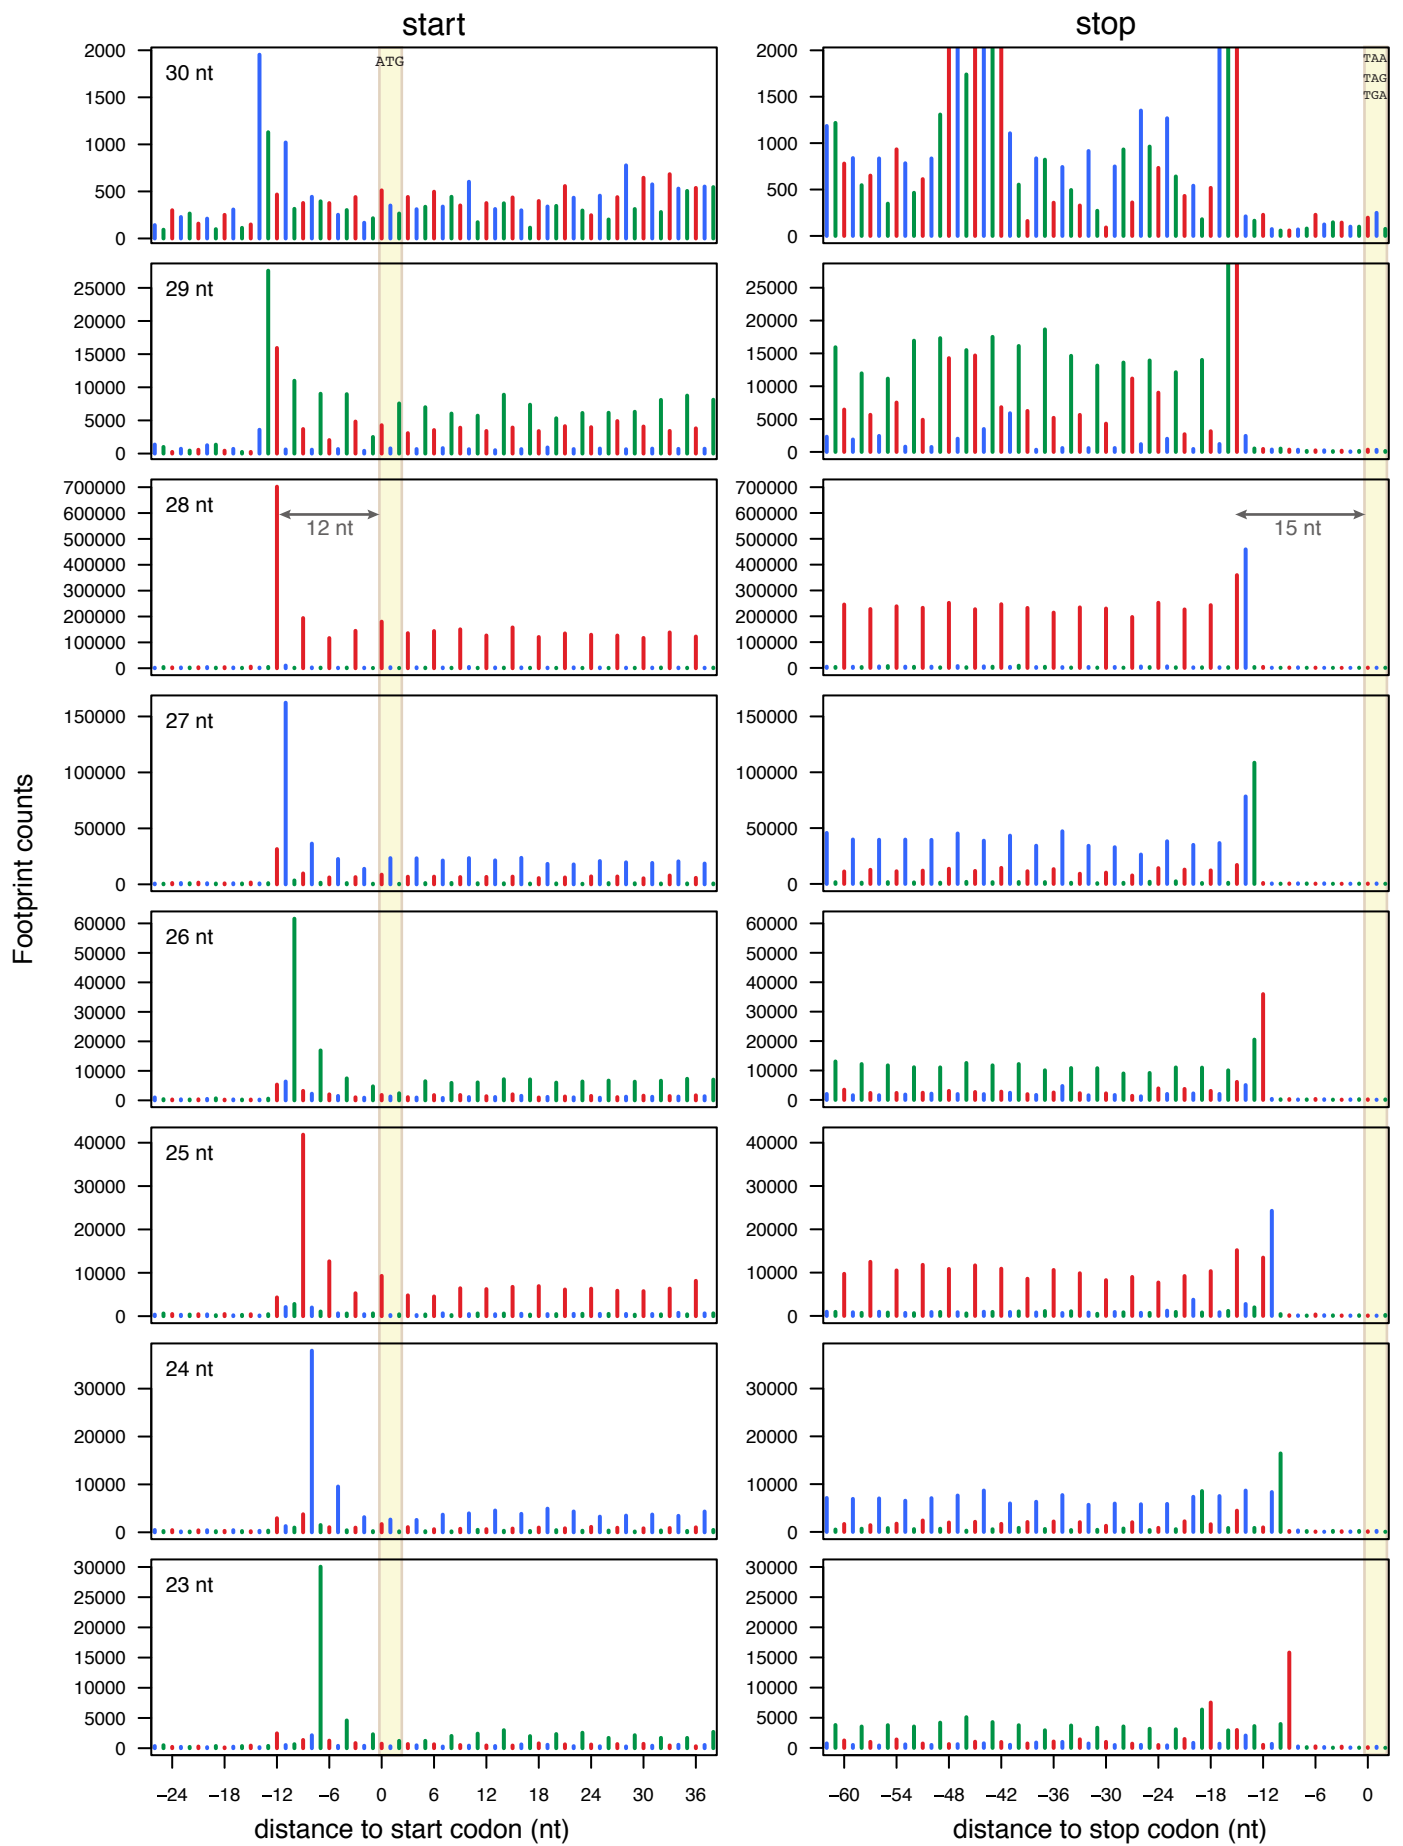

**B****Hsu\_shoot** (plotting 1st nt of footprint)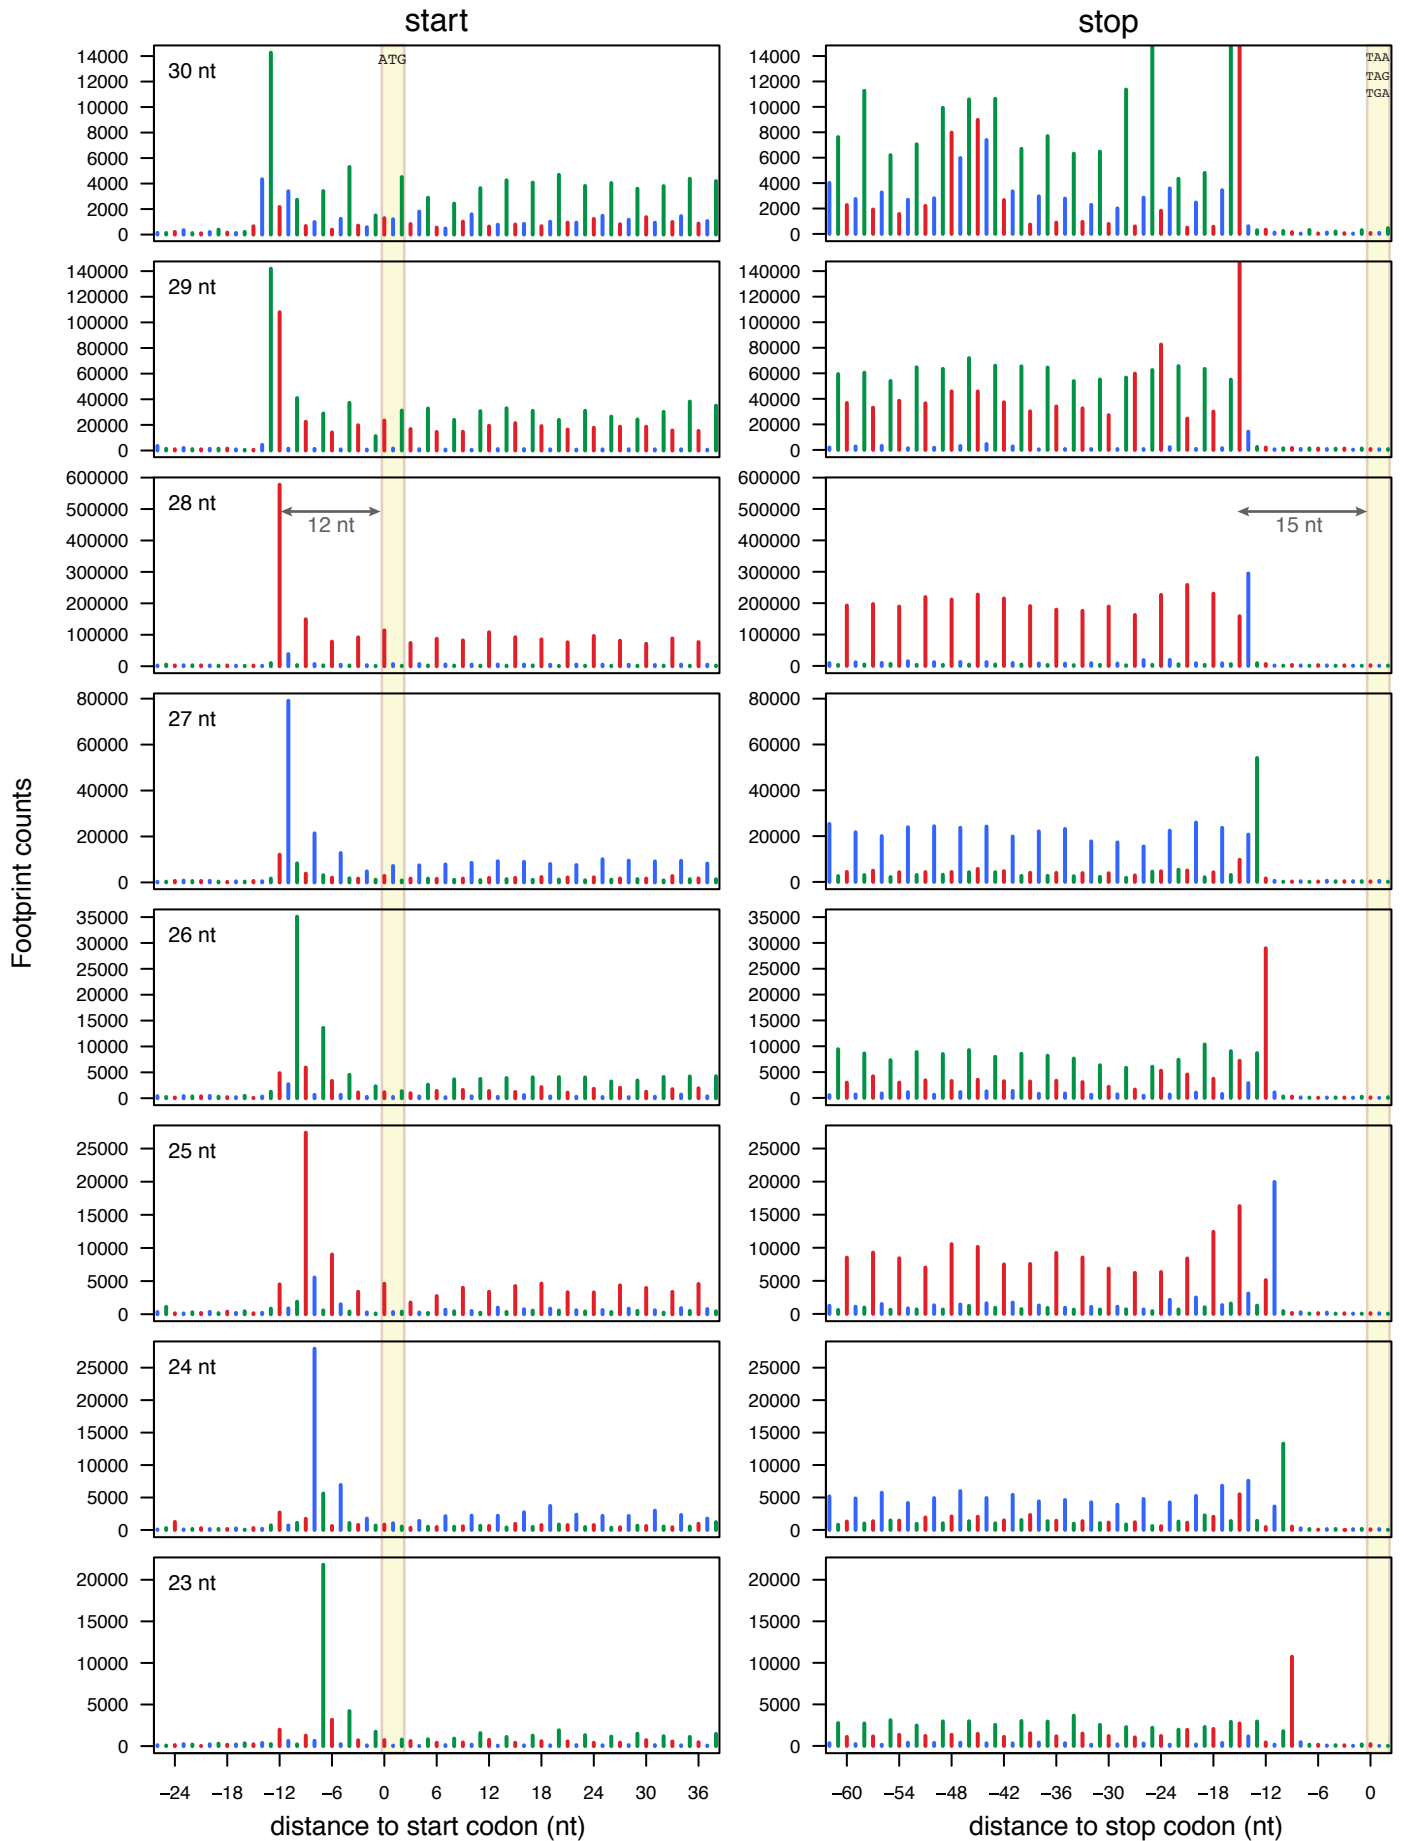

**C****Juntawong (plotting 1st nt of footprint)**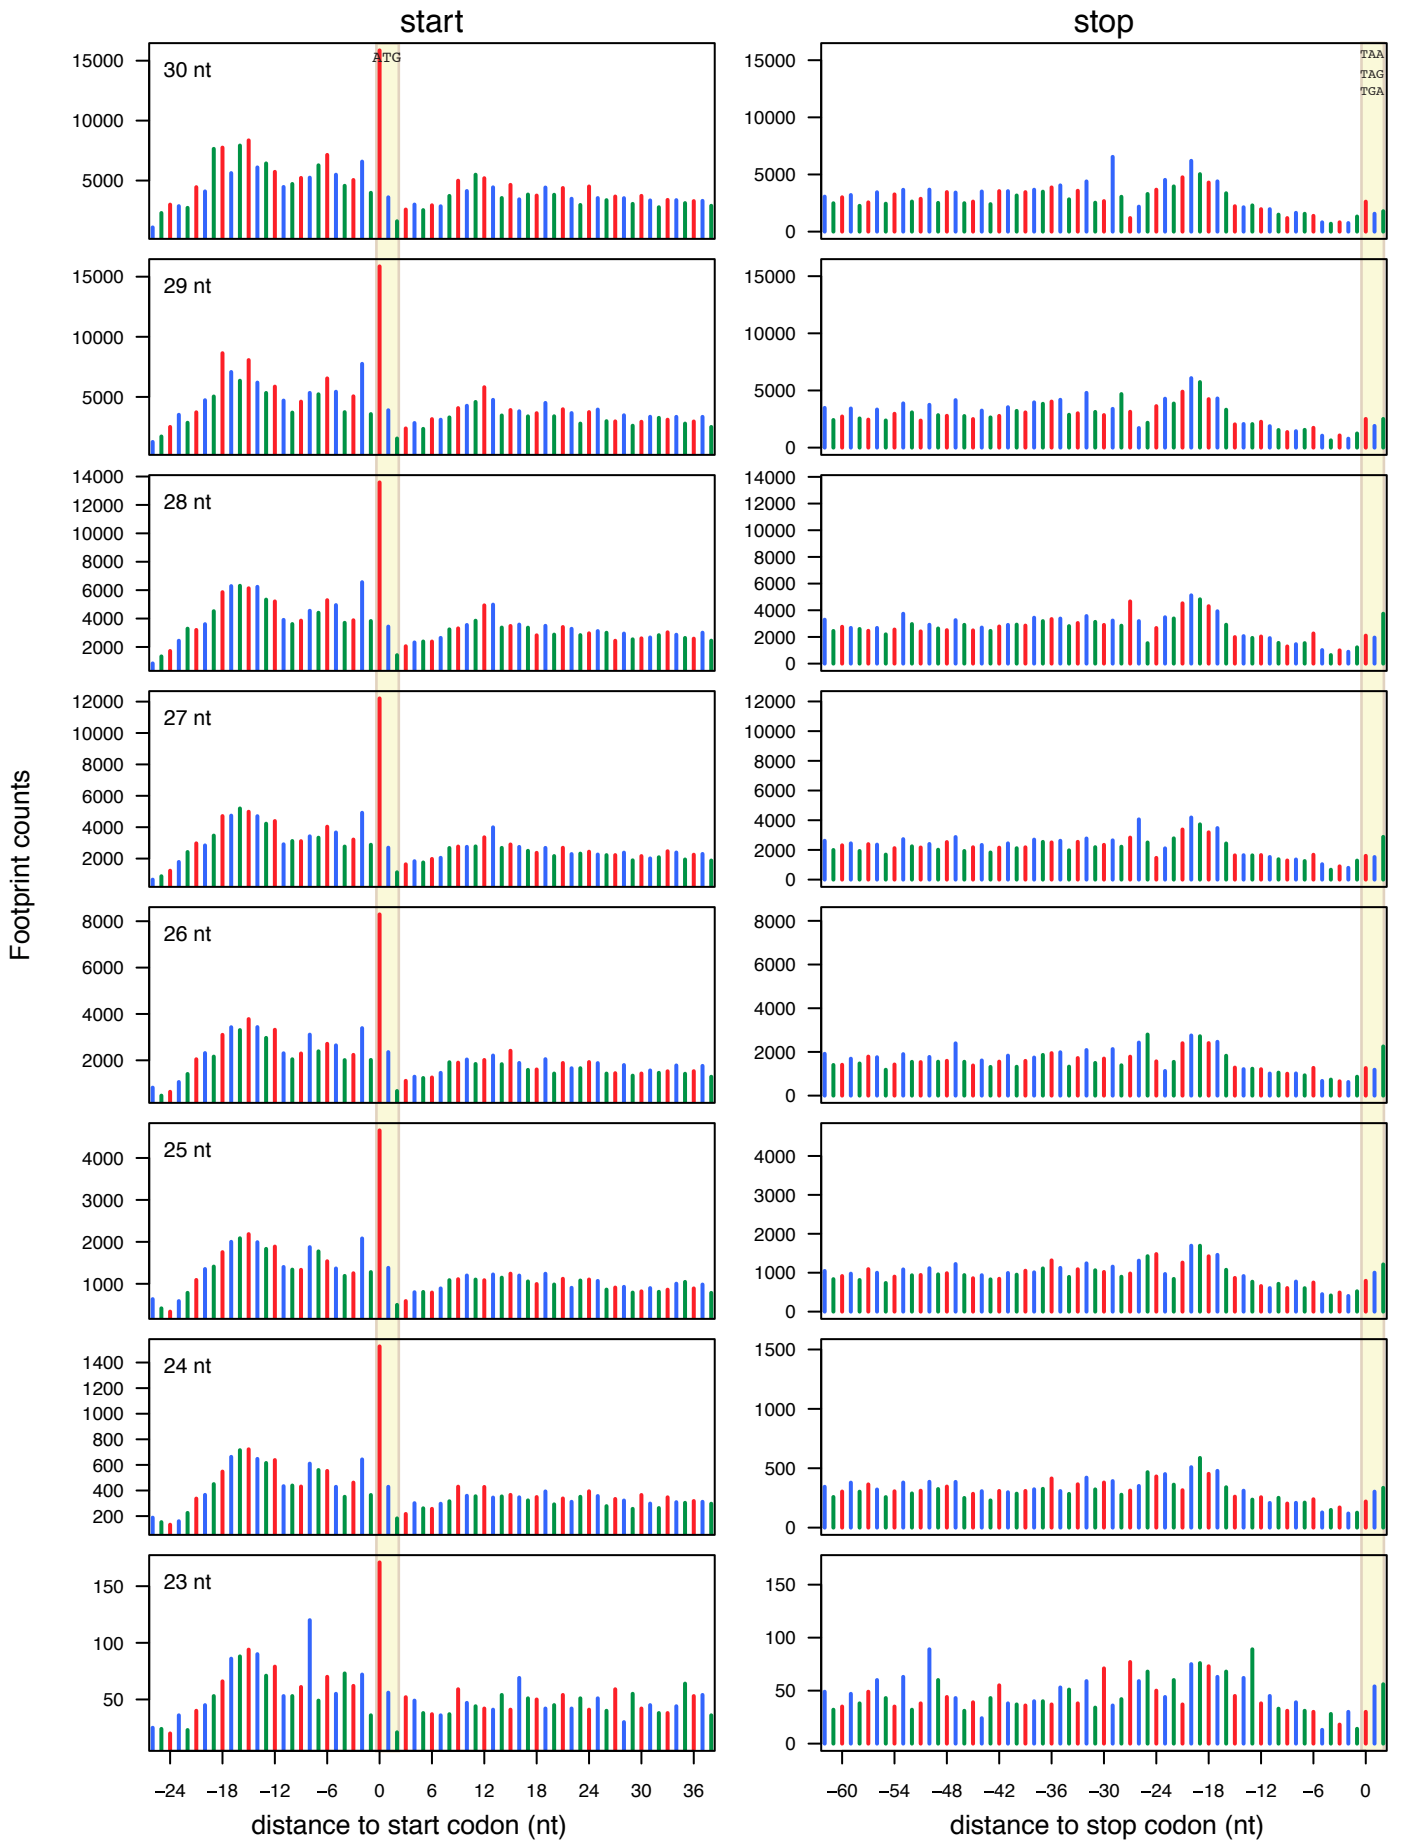

**D****Liu (1st nt of footprint)**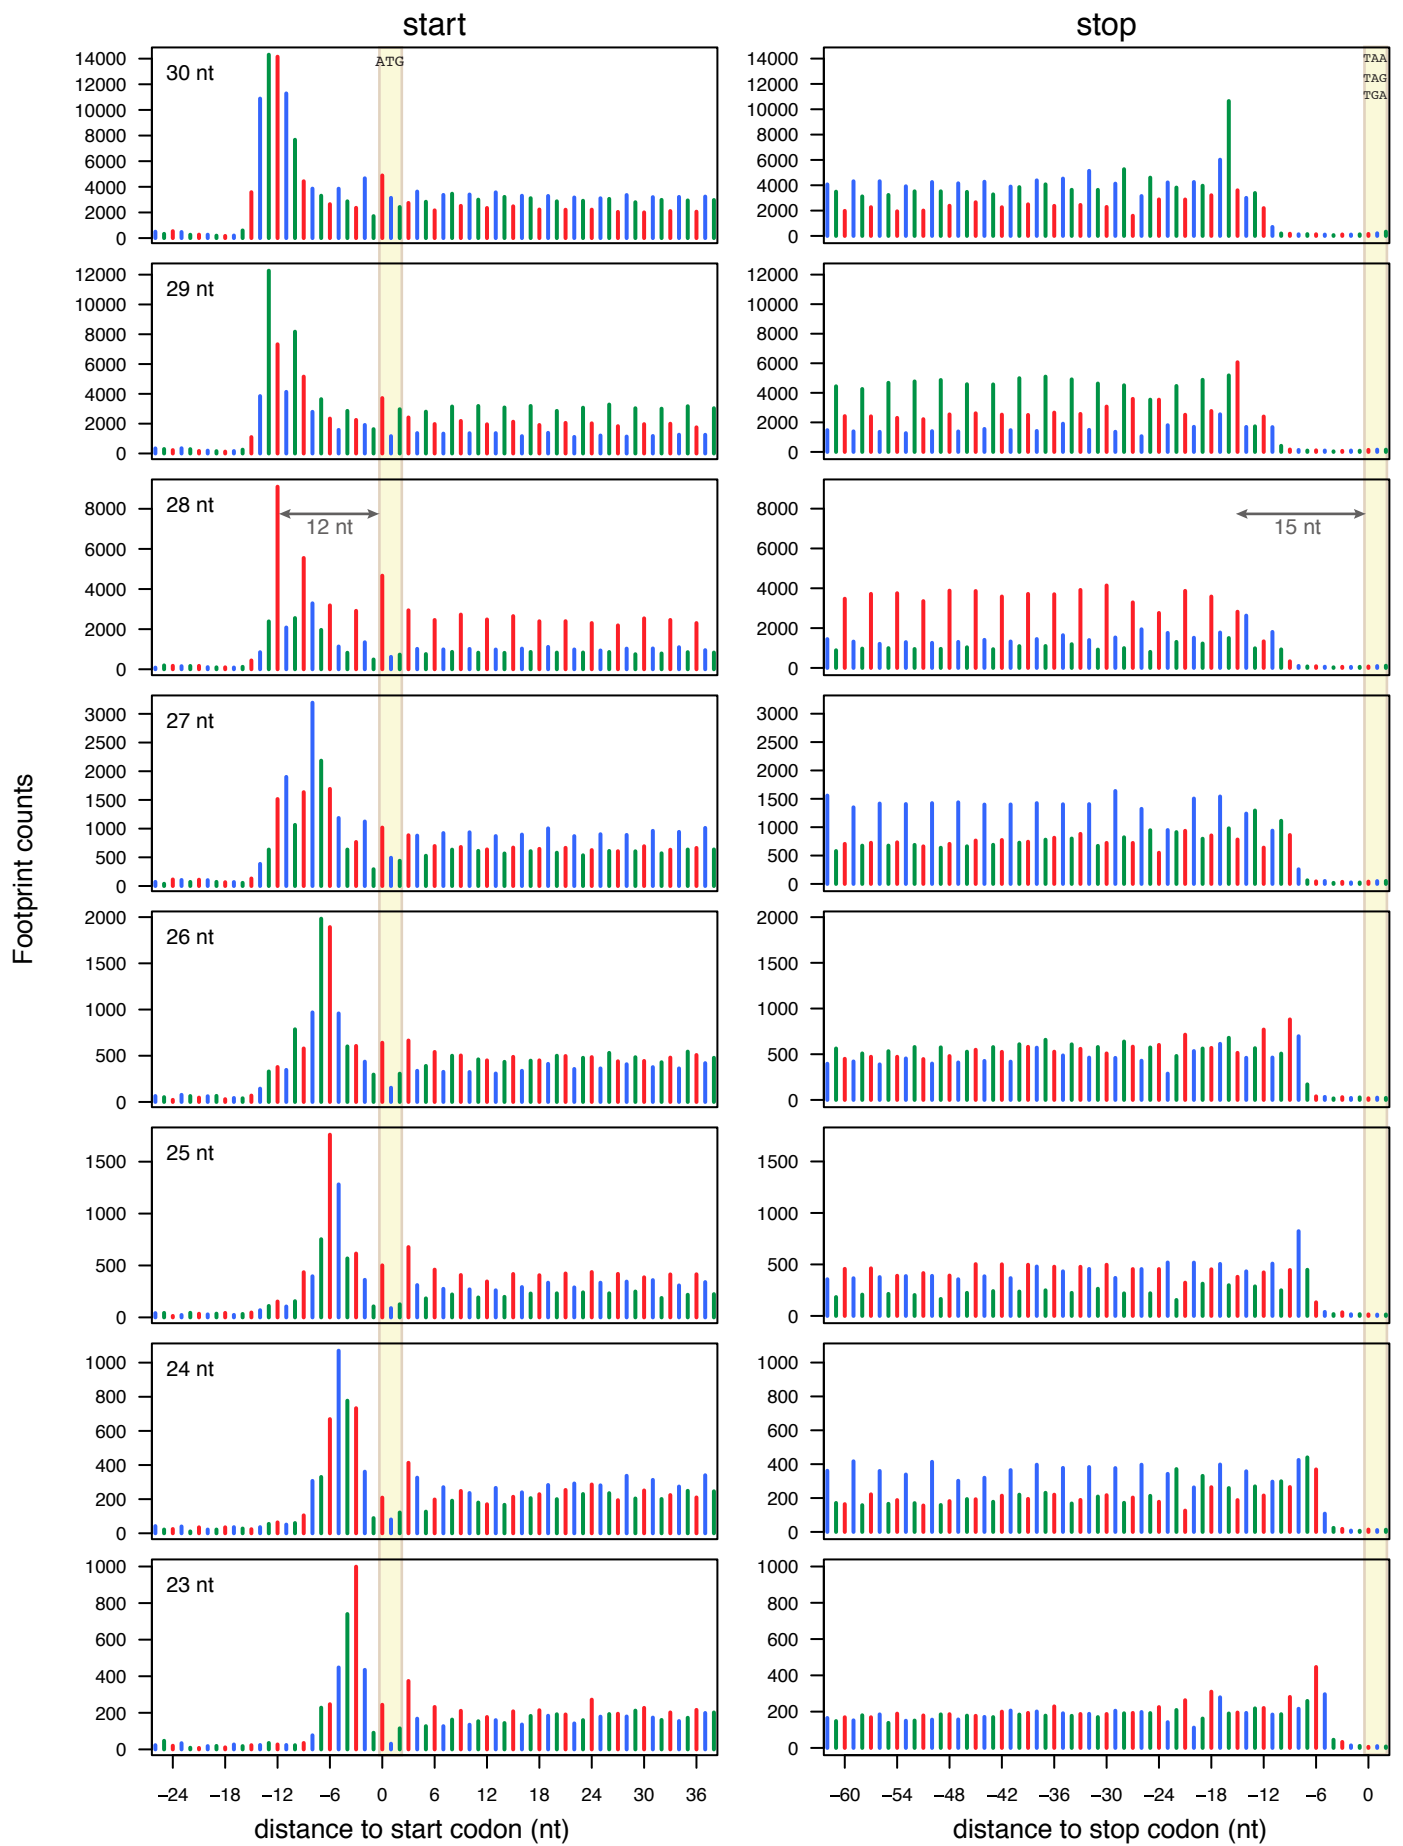

**E****Merchante** (plotting 1st nt of footprint)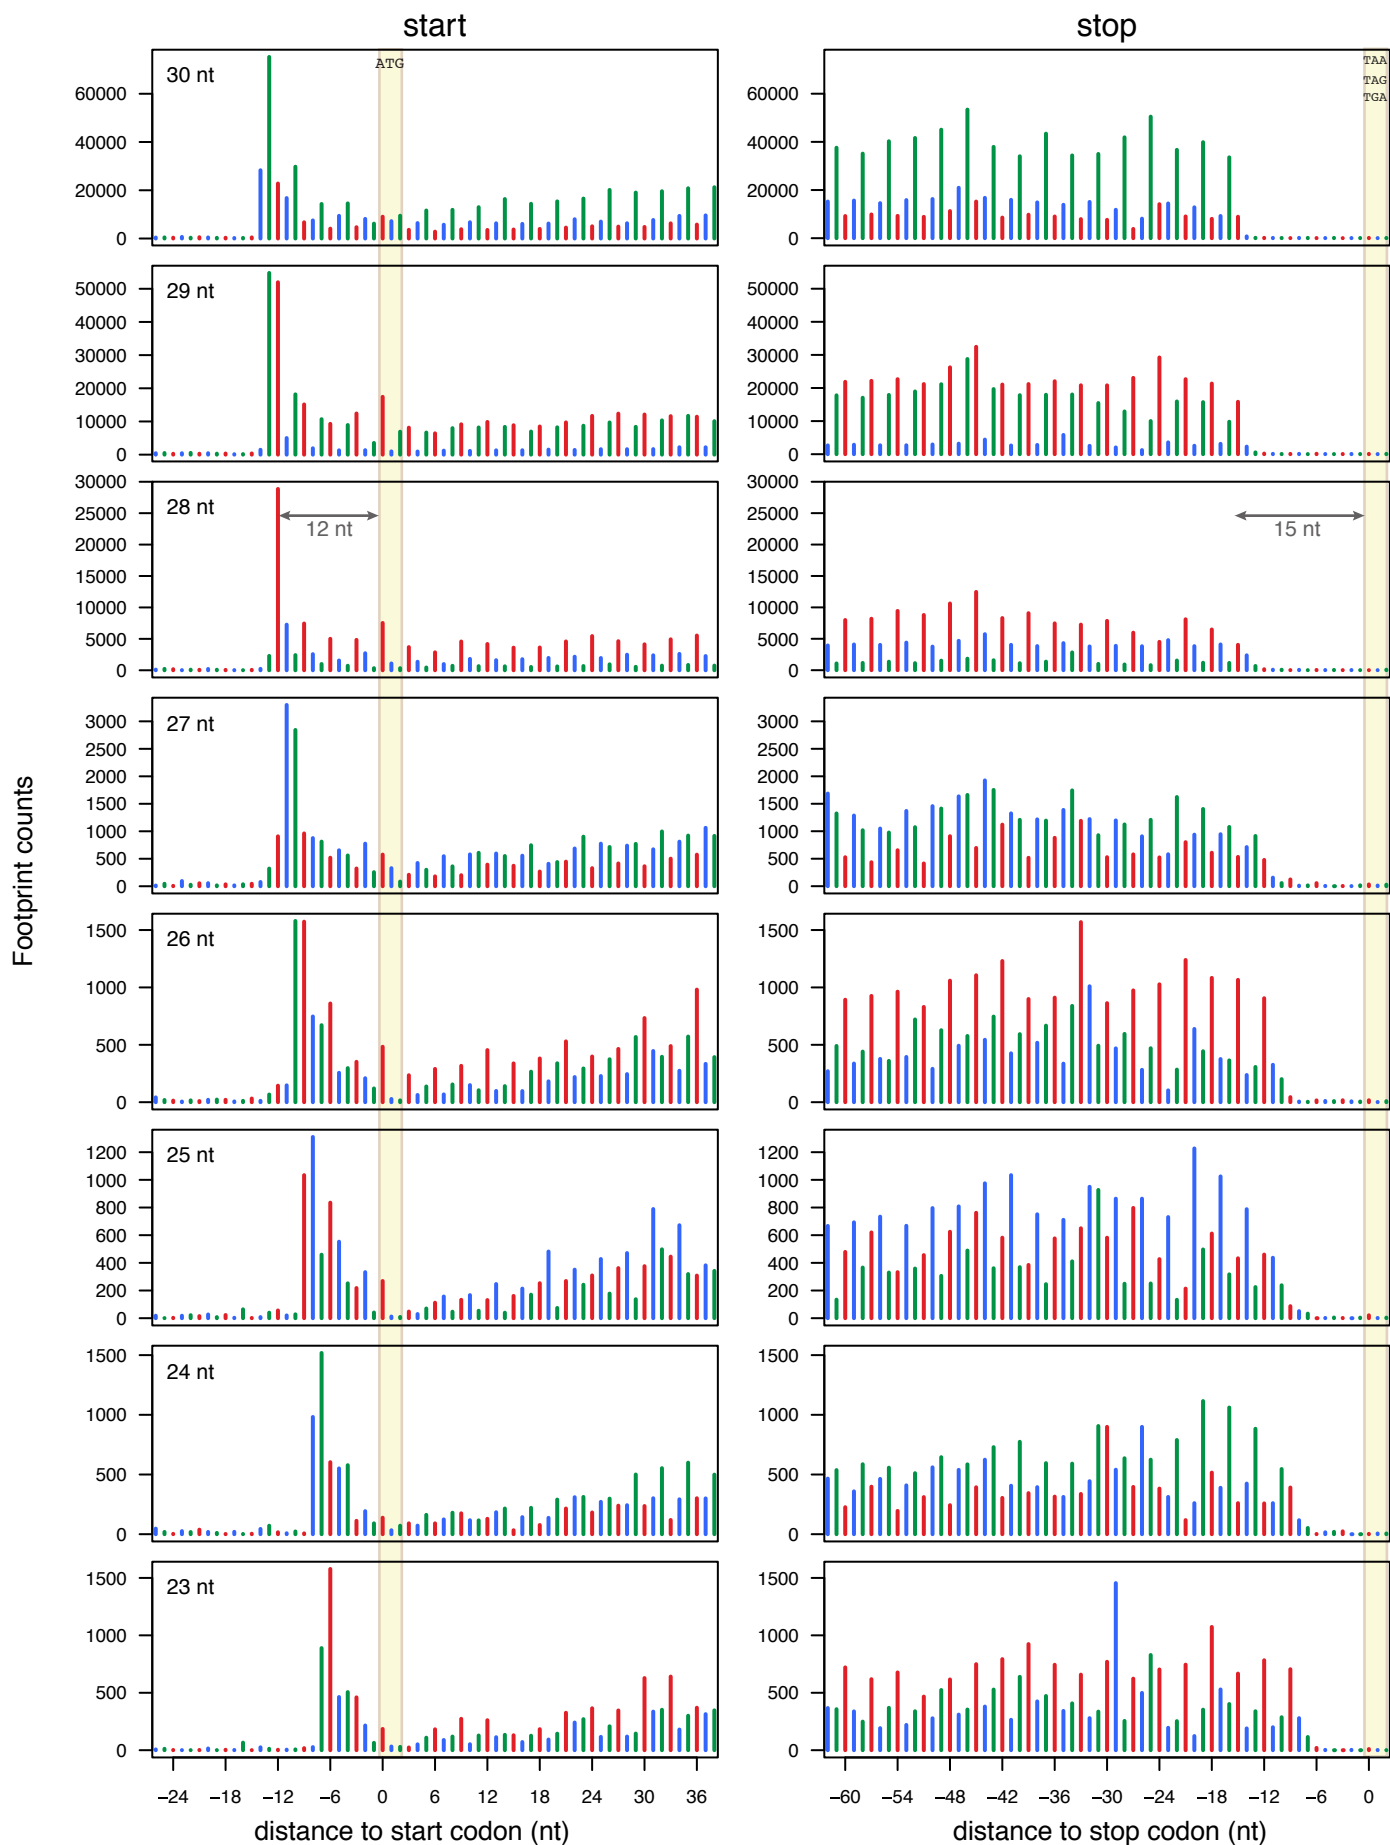

F

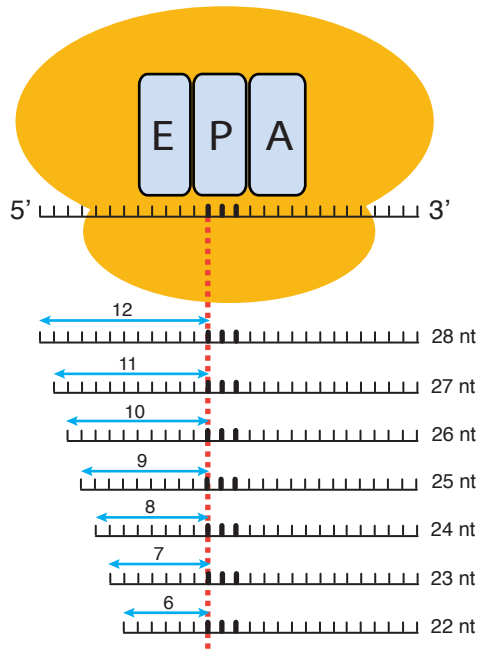

Supplement: pnas.1614788113.sfig04.pdf [file pnas.1614788113.sfig04.pdf]
