# Supplementary material
Source: PubMed Central journal article supplement (PMC5111709)
Supplement: pnas.1614788113.sfig07.pdf [file pnas.1614788113.sfig07.pdf]

**A**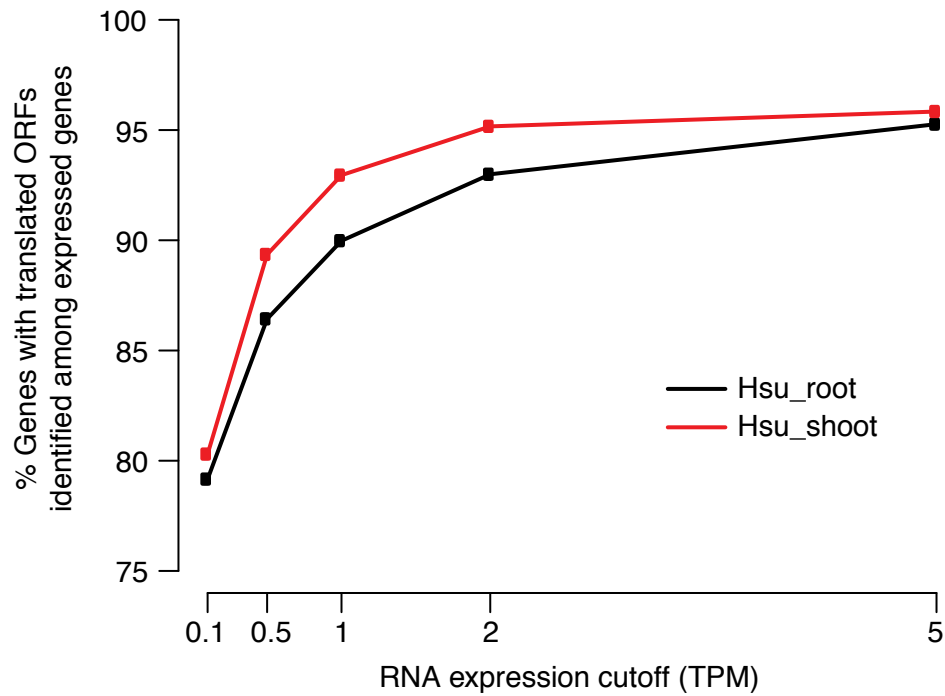**B**

Number of expressed genes with translated ORFs found/ Number of expressed genes

| RNA expression cutoff (TPM) | Root         | Shoot        | Total        |
|-----------------------------|--------------|--------------|--------------|
| 0.1                         | 16651/ 21045 | 16069/ 20014 | 18148/ 21848 |
| 0.5                         | 16472/ 19067 | 15348/ 17180 | 17901/ 19928 |
| 1                           | 16039/ 17830 | 14233/ 15315 | 17368/ 18745 |
| 2                           | 14864/ 15987 | 11971/ 12579 | 16129/ 17020 |
| 5                           | 11513/ 12087 | 7326/ 7644   | 12714/ 13219 |
