# Supplementary material
Source: PubMed Central journal article supplement (PMC5111709)

**A**

| Buffer                 | A   | B   | C   | D   |
|------------------------|-----|-----|-----|-----|
| Tris-HCl, pH 8 (mM)    | 200 | 200 | 200 | 100 |
| KCl (mM)               | 50  | 40  | 30  | 40  |
| MgCl <sub>2</sub> (mM) | 25  | 20  | 15  | 20  |

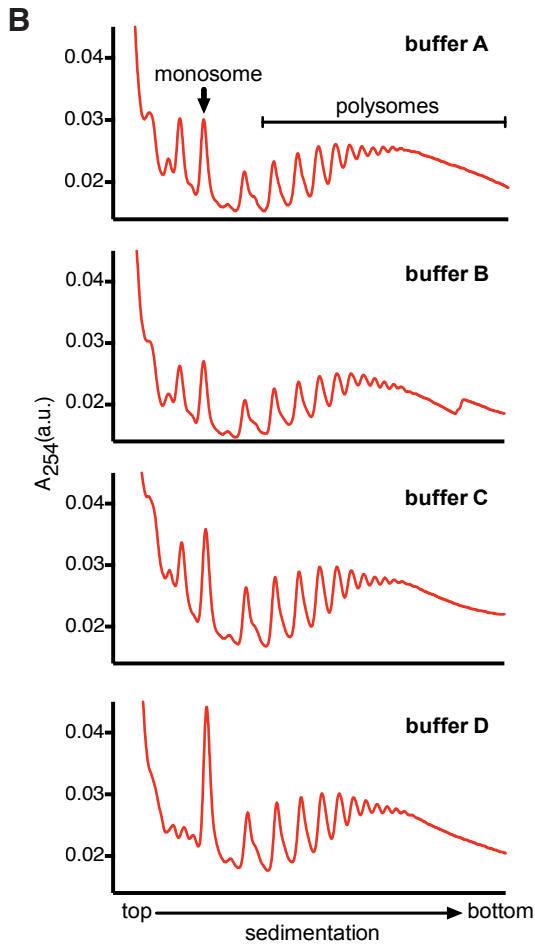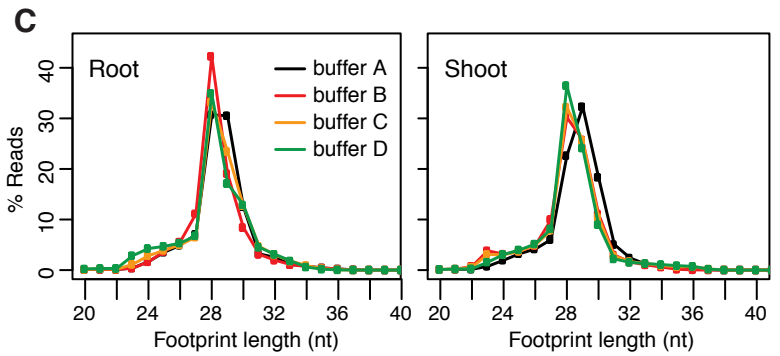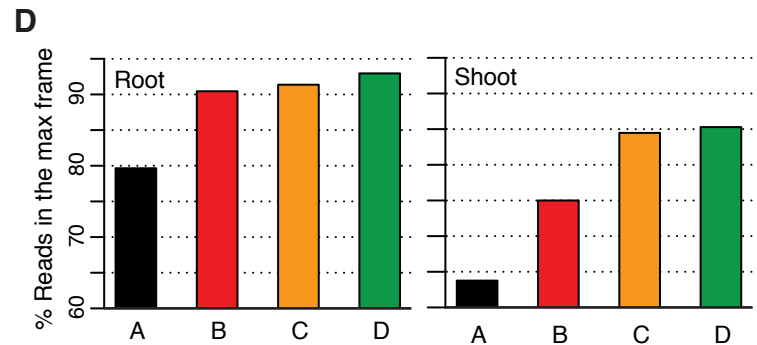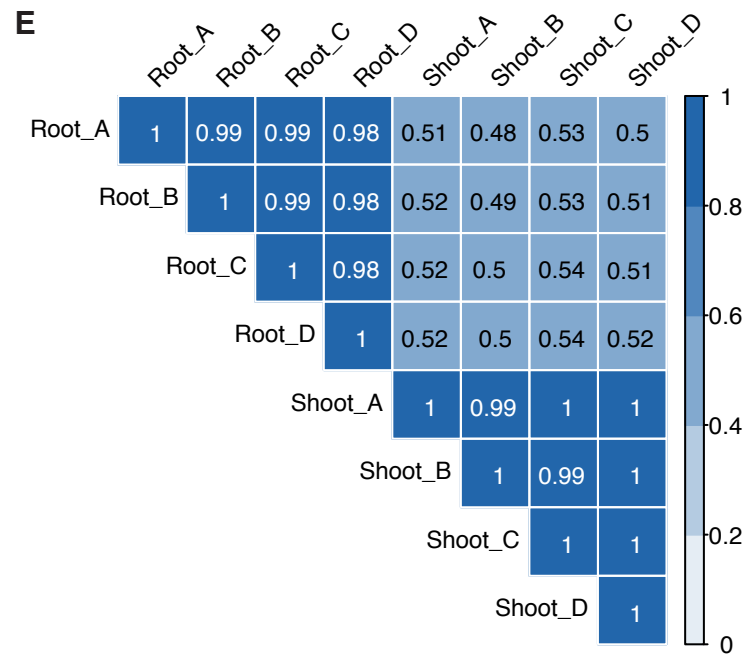

Supplement: pnas.1614788113.sfig01.pdf [file pnas.1614788113.sfig01.pdf]

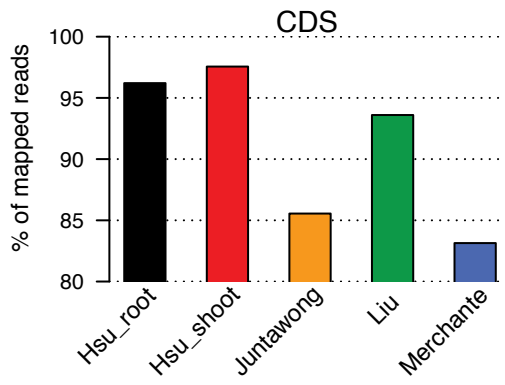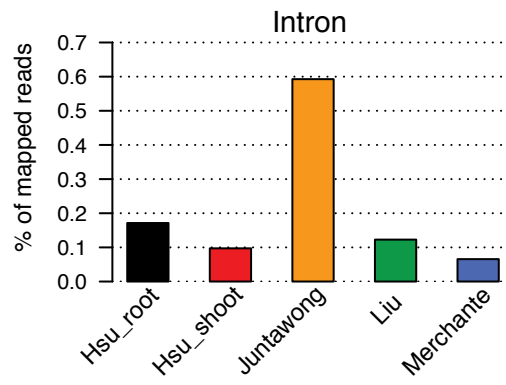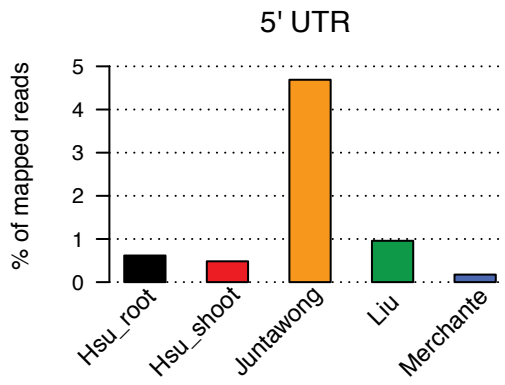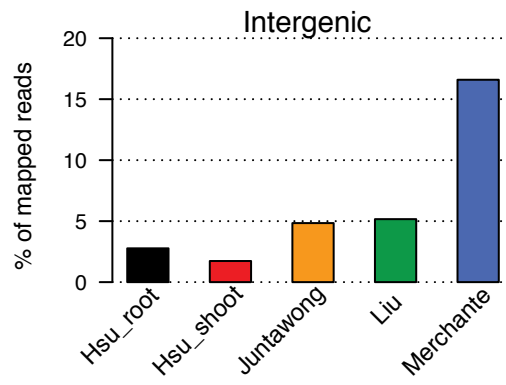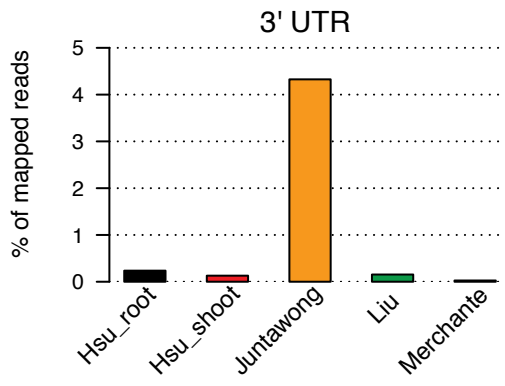

Supplement: pnas.1614788113.sfig03.pdf [file pnas.1614788113.sfig03.pdf]

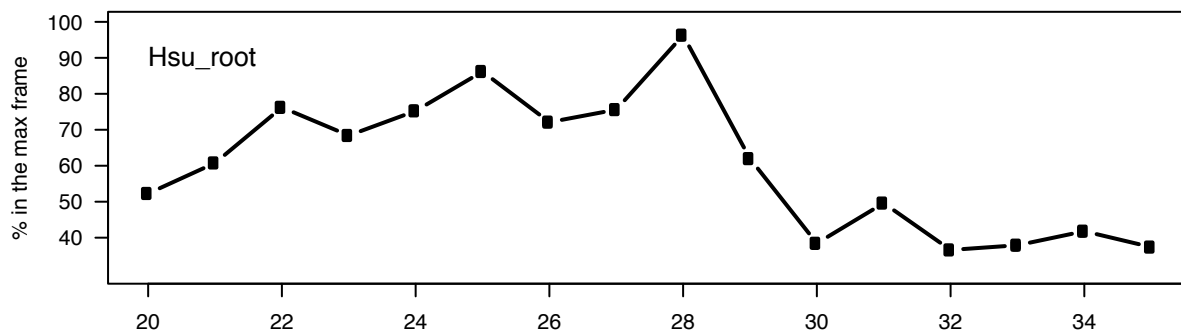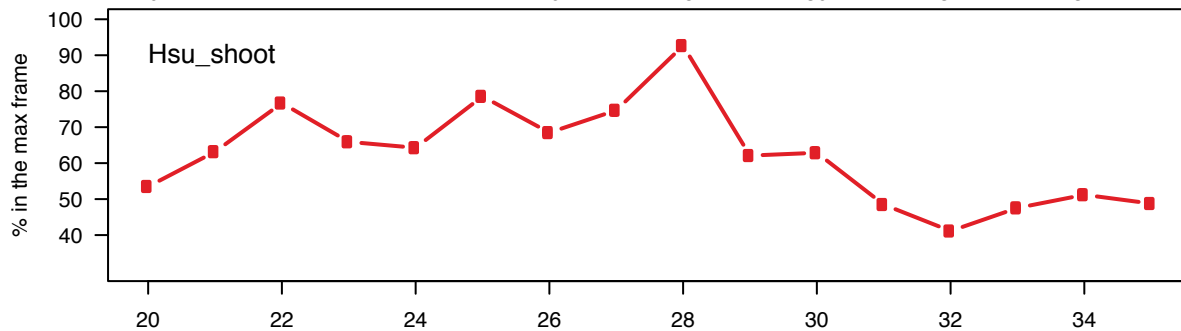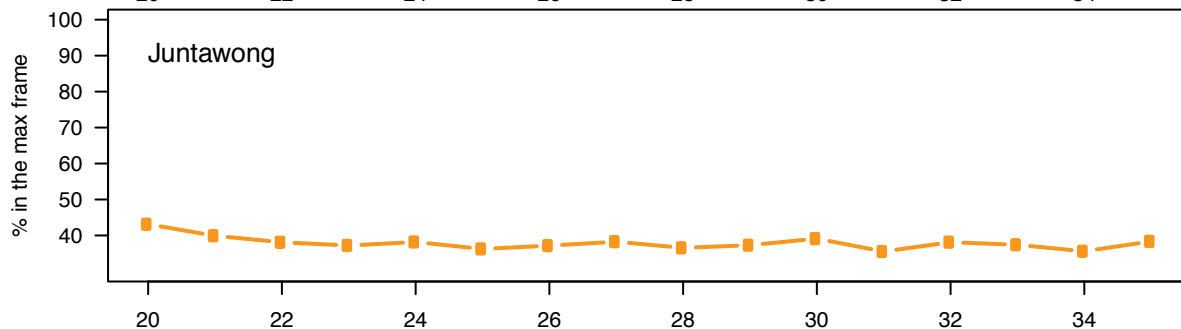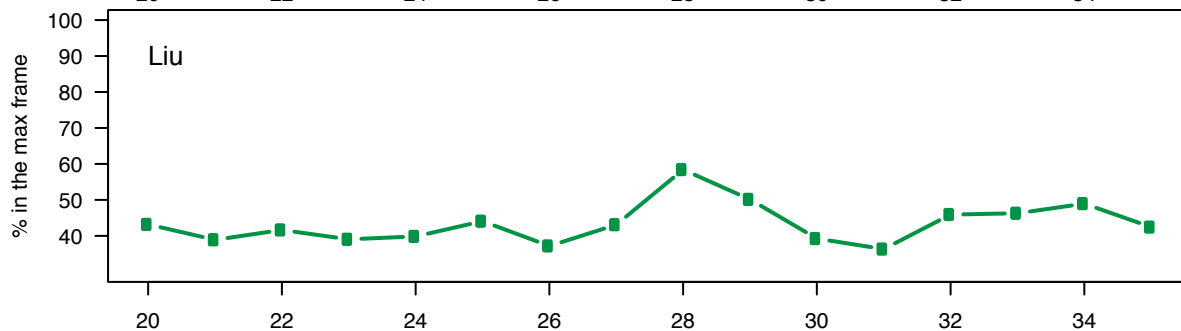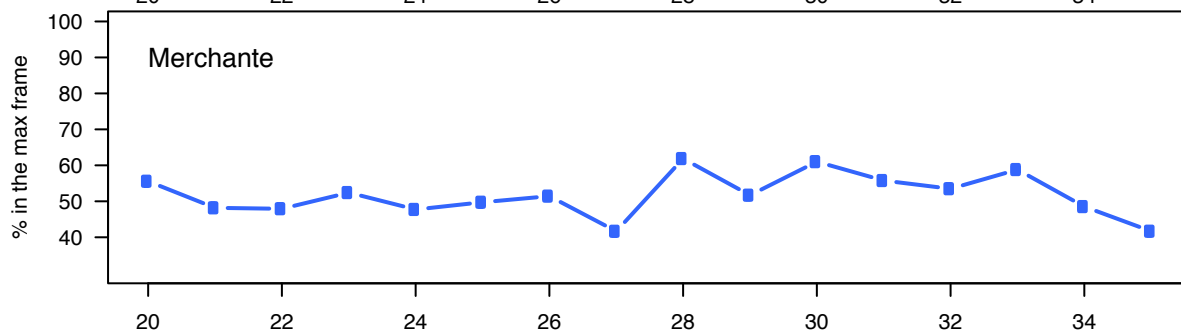

Footprint length (nt)

Supplement: pnas.1614788113.sfig05.pdf [file pnas.1614788113.sfig05.pdf]

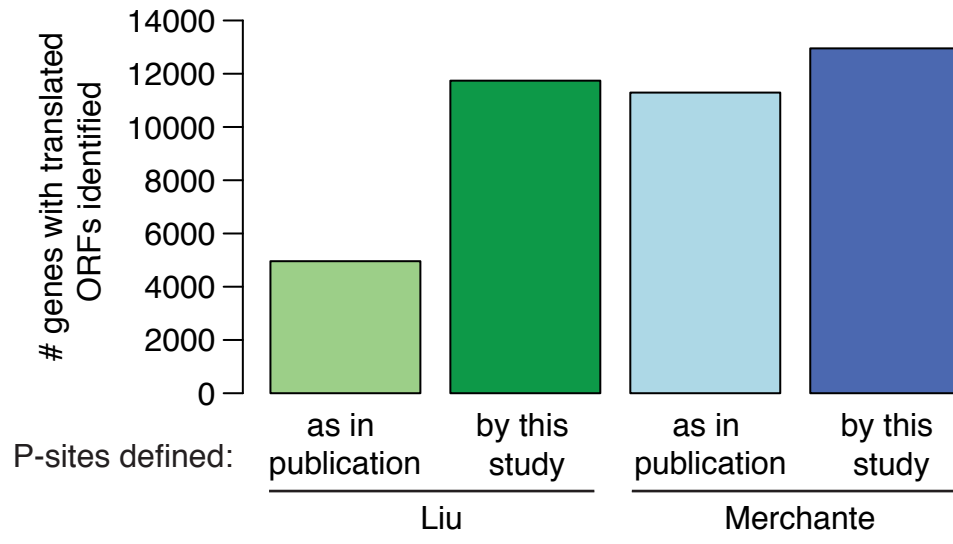

Supplement: pnas.1614788113.sfig06.pdf [file pnas.1614788113.sfig06.pdf]

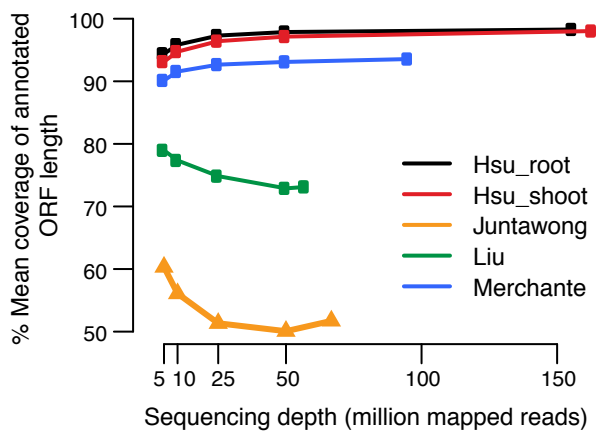

Supplement: pnas.1614788113.sfig08.pdf [file pnas.1614788113.sfig08.pdf]

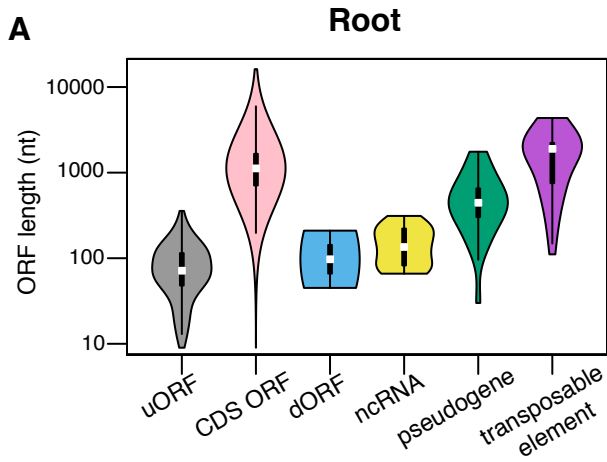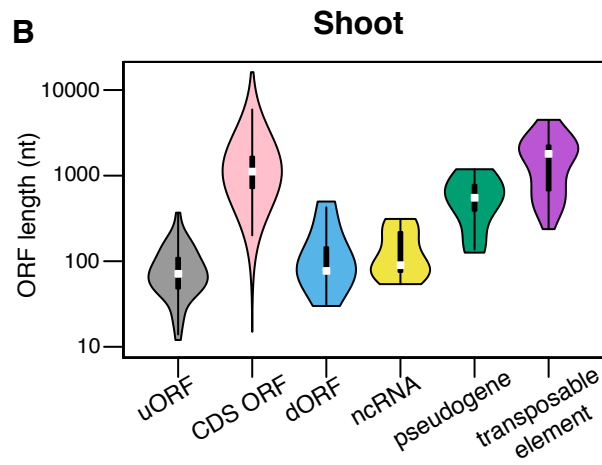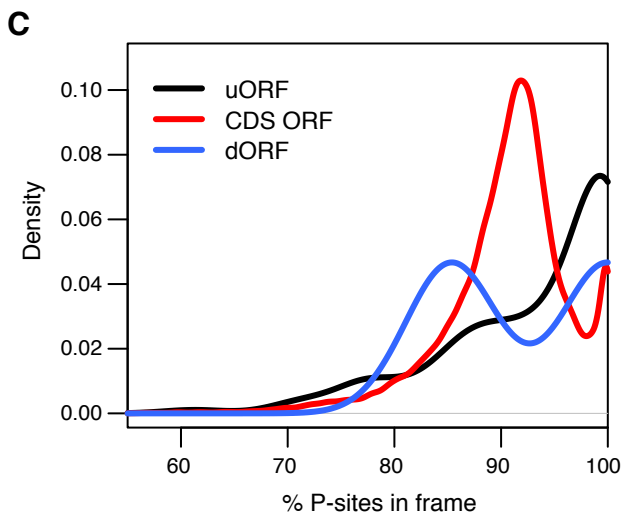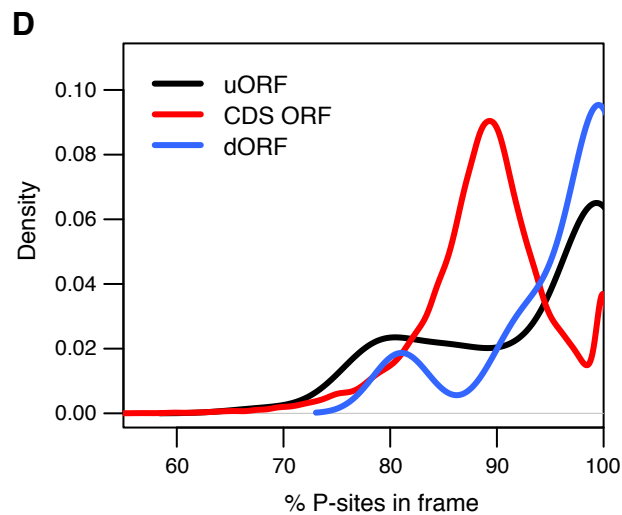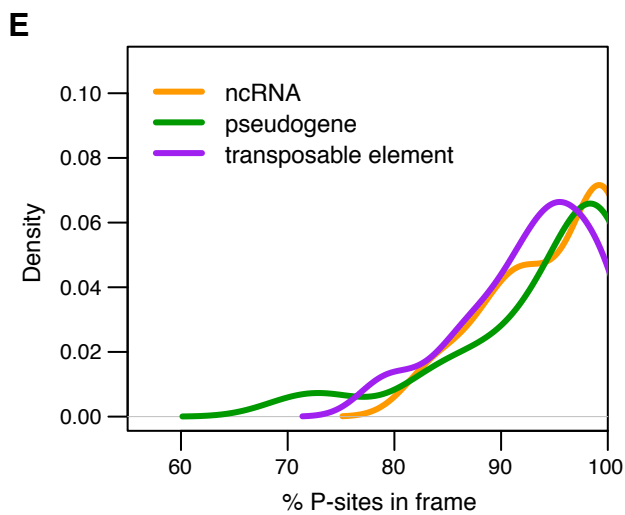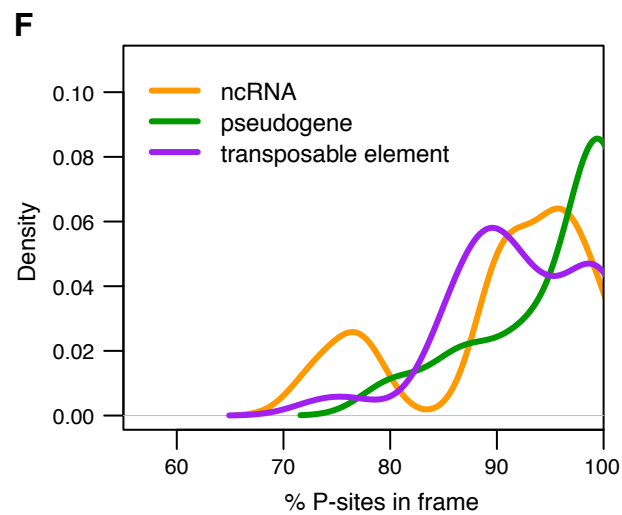

Supplement: pnas.1614788113.sfig09.pdf [file pnas.1614788113.sfig09.pdf]

TAIR10\_protein\_coding gene\_model

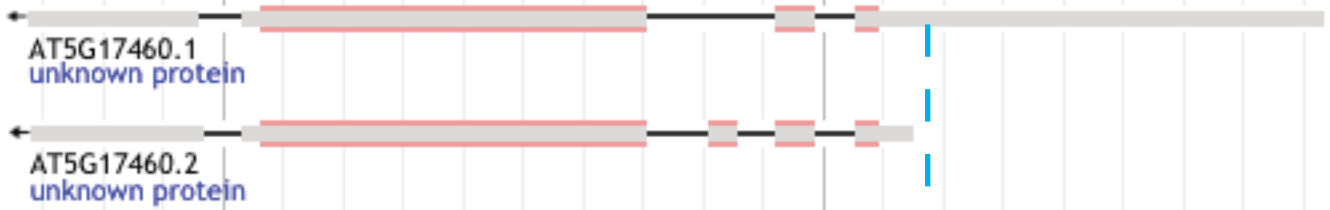

EST/ full-length cDNA (Campbell et al., 2014)

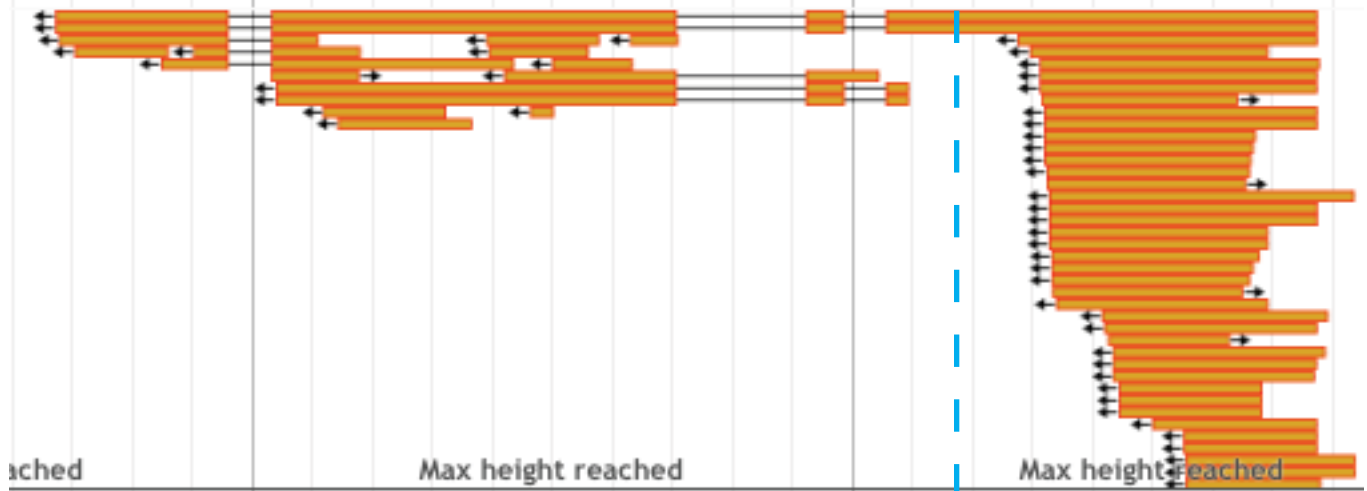

Supplement: pnas.1614788113.sfig10.pdf [file pnas.1614788113.sfig10.pdf]

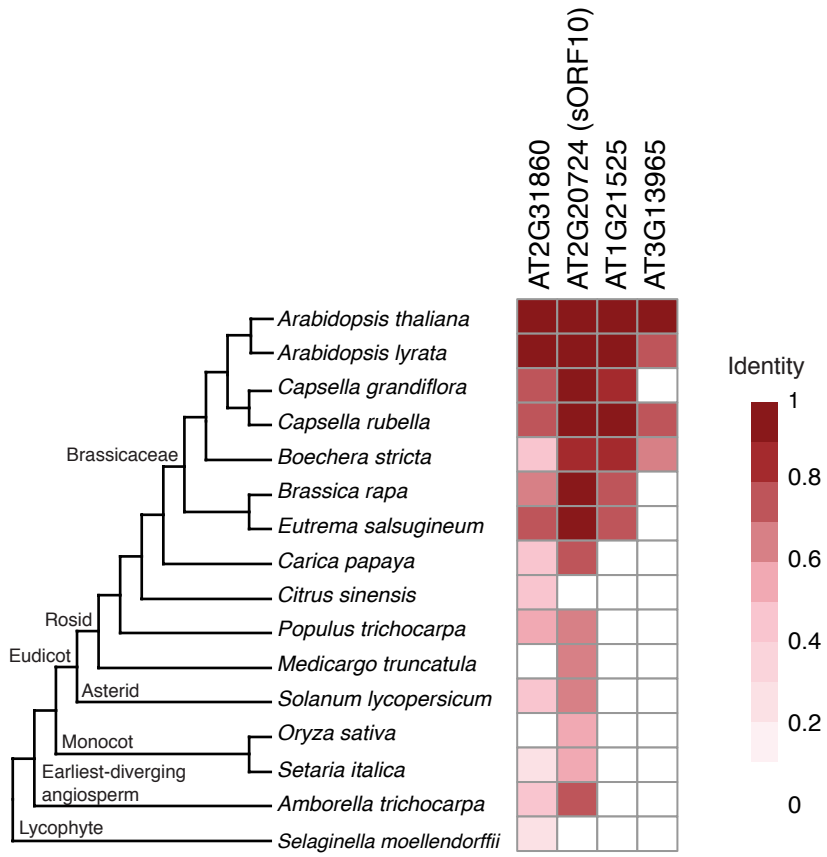

Supplement: pnas.1614788113.sfig11.pdf [file pnas.1614788113.sfig11.pdf]
